# Supplementary material
Source: publisher figshare collection journal article supplement (https://acs.figshare.com/ndownloader/files/4449433)
Supplement: Supplementary file 1 [file 4449433]

# Combining voltammetry with HPLC: application to electro-oxidation of glycerol

Youngkook Kwon, Marc T. M. Koper\*

*Leiden Institute of Chemistry, Leiden University, P.O. Box 9502, 2300 RA Leiden, The Netherlands*

## List of supporting information:

- Figure S1.
- Figure S2.
- Figure S3.
- Figure S4.
- Table S1.

\*To whom all correspondence should be addressed. E-mail: [m.koper@chem.leidenuniv.nl](mailto:m.koper@chem.leidenuniv.nl)

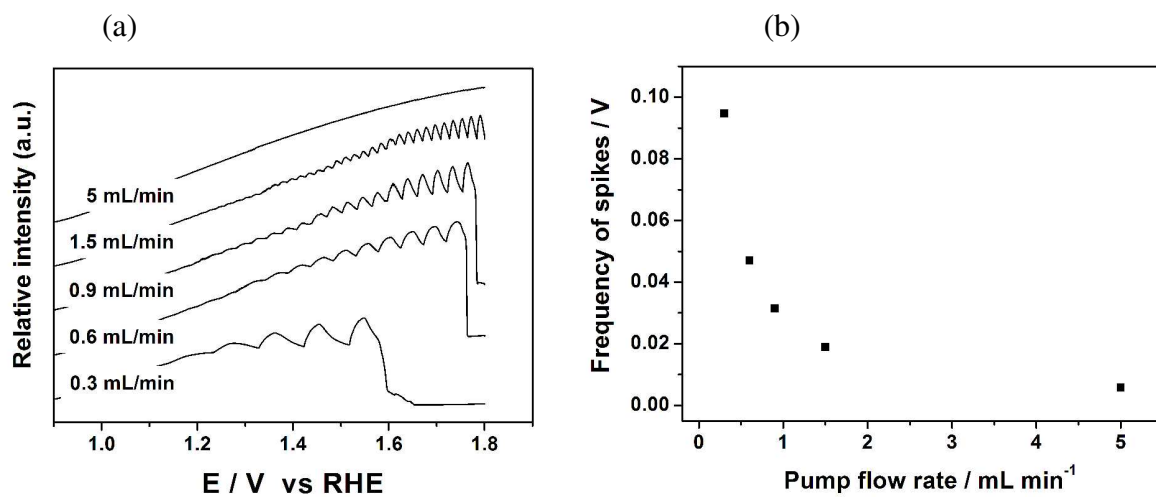

**Figure S1.** The relationship between pump flow rate of sample collection and frequency of spikes during glycerol oxidation on Au electrode. Scan rate is 10 mV/s.

(a)

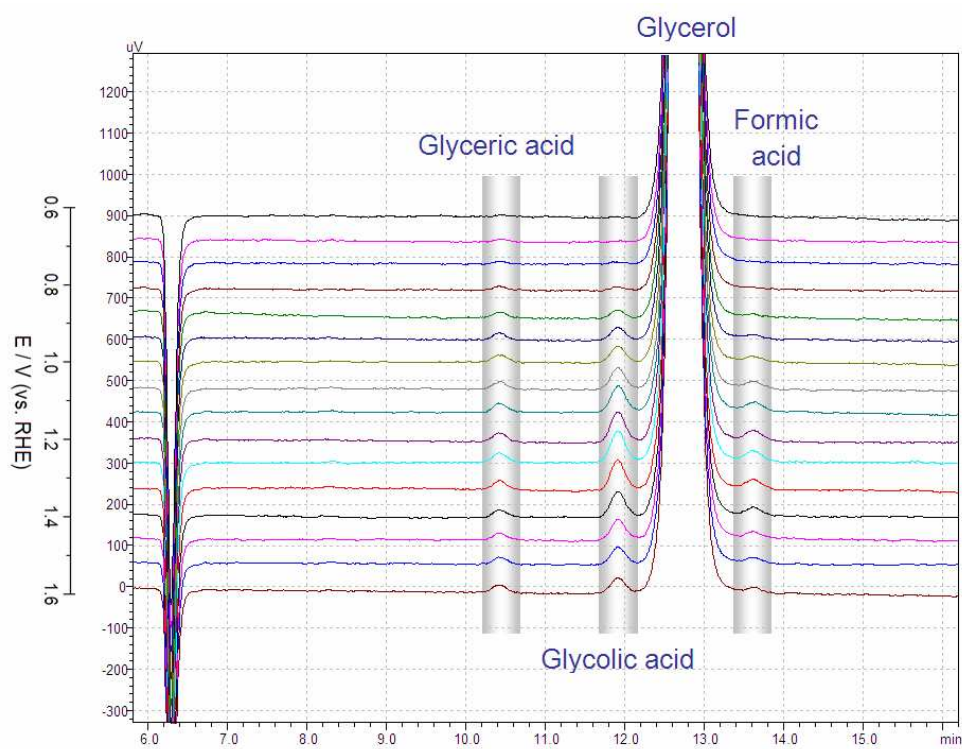

(b)

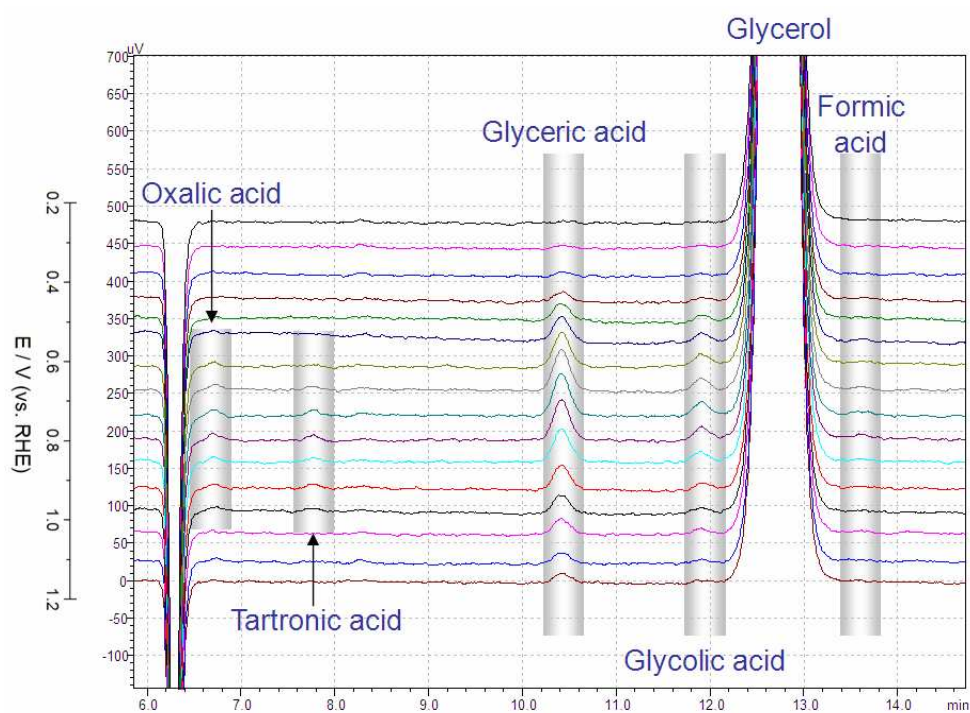

**Figure S2.** Chromatograms from HPLC analysis at 30°C with collected samples during voltammetry on (a) Au and (b) Pt electrodes.

(a)

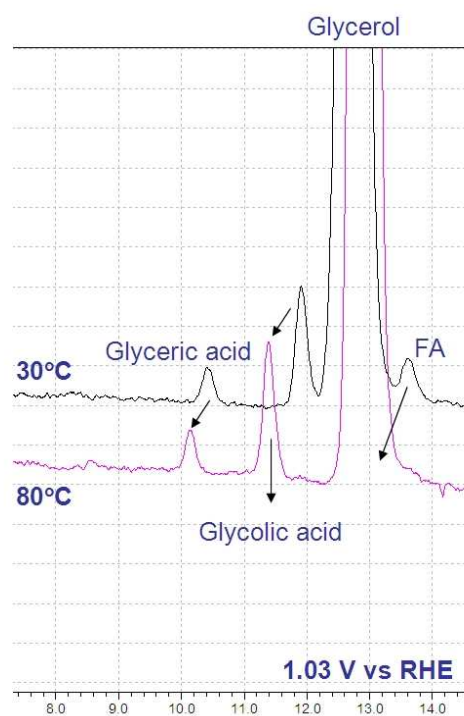

(b)

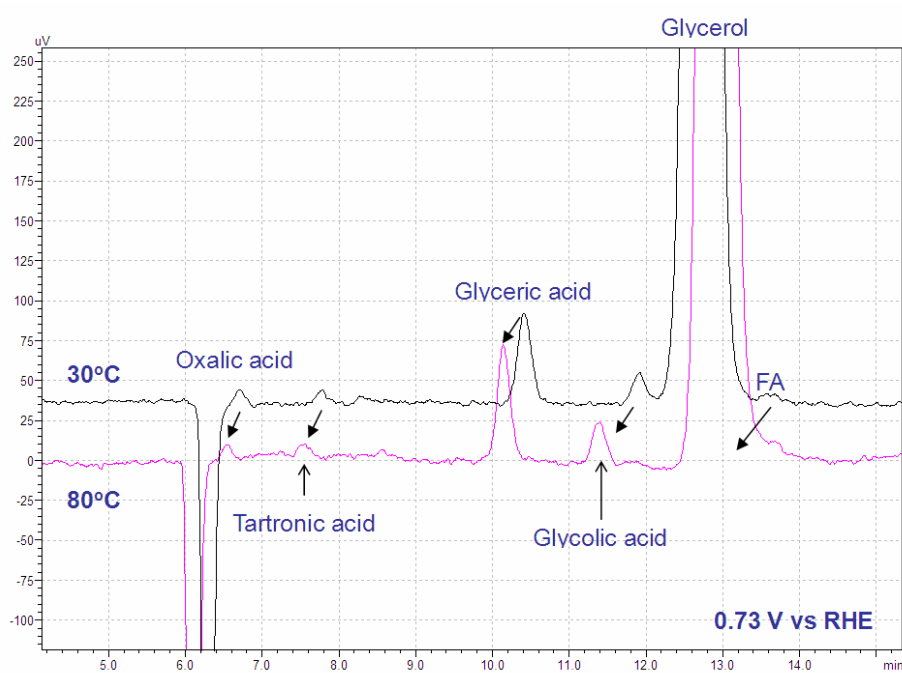

**Figure S3.** Chromatograms from HPLC analysis at 30°C and 80°C to separate, especially glyceric acid and glyceraldehyde on (a) Au and (b) Pt electrodes.

(a)

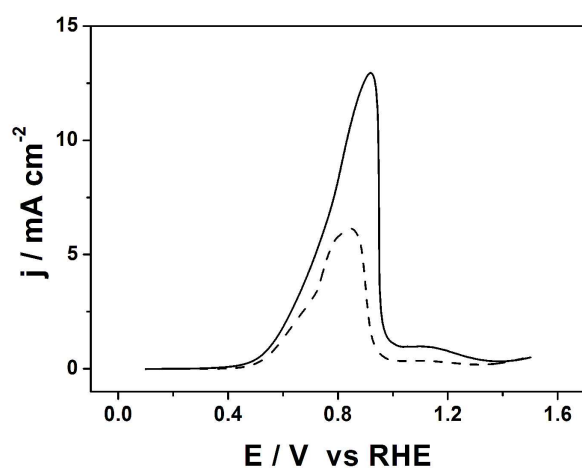

(b)

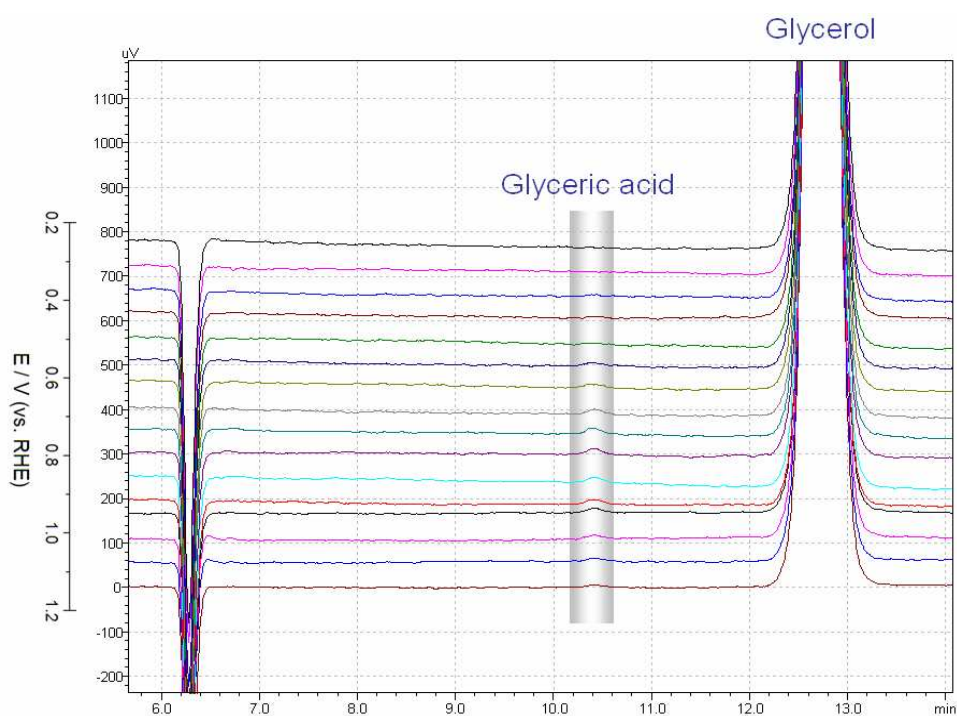

**Figure S4.** Effect of high scan rate (10 mV/s) and sample collecting flow rate (0.6  $\mu\text{L}/\text{min}$ ) on (a) the current density during linear sweep voltammetry on Pt electrode and (b) chromatograms at 30°C. Scan rate and flow rate of sample collection are 1 mV/s with 0.06  $\mu\text{L}/\text{min}$  (dashed line) and 10 mV/s with (solid line), respectively. Especially, (a) charges transferred during glycerol oxidation on 1 and 10 mV/s are  $2.936 \times 10^{-1}$  C and  $5.912 \times 10^{-2}$  C, respectively, therefore only ca. 20 % of glycerol oxidation products can be collected with 10 mV/s compared to 1 mV/s. To confirm this, (b) the concentration of glyceric acid at 0.79 V (RHE) is 0.151 mM, which is ca. 24 % of glyceric acid in Figure S2 at the same potential.

**Table S1. Retention time of glycerol oxidation products at 30°C and 80°C**

| Chemical       | Retention time (min) |        |
|----------------|----------------------|--------|
|                | 30°C                 | 80°C   |
| Oxalic acid    | 6.694                | 6.533  |
| Tartronic acid | 7.765                | 7.534  |
| Glyceric acid  | 10.414               | 10.138 |
| Glyceraldehyde | 10.475               | 11.063 |
| Glycolic acid  | 11.904               | 11.386 |
| Glycerol       | 12.725               | 12.892 |
| Formic acid    | 13.611               | 12.916 |
